# Supplementary material
Source: ML conference proceedings conference paper supplement (https://proceedings.mlr.press/v115/gimelfarb20a.html)
Supplement: Supplementary file [file gimelfarb20a-supp.pdf]

## Supplementary Material

Tables 1 and 2 describe parameter settings used in the experimentation for SARSA and DQN, respectively.

Table 1: Parameter settings for the tabular expected SARSA algorithm.

| PARAMETER  | DESCRIPTION                       | GRID-WORLD            | CART-POLE                         | SUPPLY-CHAIN          |
|------------|-----------------------------------|-----------------------|-----------------------------------|-----------------------|
|            | Table initialization              | uniform on $[0, 0.1]$ | zeros                             | uniform on $[0, 0.1]$ |
| $\eta_t$   | Learning rate ( $t$ episode #)    | 0.7                   | $\max\{\frac{1}{2}0.99^t, 0.01\}$ | 0.6                   |
| $T$        | Max. episode length               | 200                   | 200                               | 200                   |
| $\mu_0$    | Prior parameter in (8)            | 0                     | 0                                 | 0                     |
| $\tau_0$   | Prior parameter in (8)            | 1                     | 1                                 | 1                     |
| $a_0$      | Prior parameter in (8)            | 500                   | 500                               | 500                   |
| $b_0$      | Prior parameter in (8)            | 500                   | 500                               | 500                   |
| $\alpha_0$ | Prior parameter for $\varepsilon$ | 1                     | 10                                | 1000                  |
| $\beta_0$  | Prior parameter for $\varepsilon$ | $1 + 0.01$            | $10 + 0.01$                       | $1000 + 0.01$         |

Table 2: Parameter settings for the deep Q-learning algorithm.

| PARAMETER  | DESCRIPTION                       | GRID-WORLD     | CART-POLE      | SUPPLY-CHAIN    |
|------------|-----------------------------------|----------------|----------------|-----------------|
|            | Network initialization            | Glorot uniform | Glorot uniform | Glorot uniform  |
|            | Network topology                  | 16-25-25-4     | 4-12-12-2      | 102-100-100-100 |
| $f$        | Hidden activation                 | ReLU           | ReLU           | ReLU            |
|            | Regularization                    | none           | $L2(10^{-6})$  | none            |
| $\phi$     | State encoding                    | one-hot        | none           | one-hot         |
| $\eta_t$   | Learning rate                     | 0.001          | 0.0005         | 0.001           |
| $N$        | Replay buffer size                | 2000           | 2000           | 3000            |
| $B$        | Batch size                        | 24             | 32             | 64              |
|            | Training epochs per batch         | 5              | 3              | 2               |
| $T$        | Max. episode length               | 200            | 200            | 200             |
| $\mu_0$    | Prior parameter in (8)            | 0              | 0              | 0               |
| $\tau_0$   | Prior parameter in (8)            | 1              | 1              | 1               |
| $a_0$      | Prior parameter in (8)            | 500            | 500            | 500             |
| $b_0$      | Prior parameter in (8)            | 500            | 500            | 500             |
| $\alpha_0$ | Prior parameter for $\varepsilon$ | 1              | 5              | 25              |
| $\beta_0$  | Prior parameter for $\varepsilon$ | $1 + 0.01$     | $5 + 0.01$     | $25 + 0.01$     |
